# Supplementary material for: Rutin-modified silver nanoparticles as a chromogenic probe for the selective detection of Fe3+in aqueous medium
Source: Royal Society of Chemistry journal article supplement (doi:10.1039/c9ra06653e), 2019-01-01
Supplement: c9ra06653e1.pdf [file c9ra06653e1.pdf]

## ELECTRONIC SUPPLEMENTARY INFORMATION

### **Rutin-modified silver nanoparticles as a chromogenic probe for the selective detection of Fe<sup>3+</sup> in aqueous medium**

Mayra S. Coutinho<sup>a</sup>, Eloah Latocheski<sup>b</sup>, Jannyely M. Neri<sup>a</sup>, Ana C.O. Neves<sup>a</sup>, Josiel B. Domingos<sup>b</sup>,  
Livia N. Cavalcanti<sup>a</sup>, Luiz H.S. Gasparotto<sup>a</sup>, Edgar P. Moraes<sup>a</sup> and Fabrício G. Menezes<sup>a\*</sup>

<sup>a</sup> *Institute of Chemistry, Federal University of Rio Grande do Norte, 59072-970 Natal, RN, Brazil*

<sup>b</sup> *Department of Chemistry, Federal University of Santa Catarina, Florianópolis, SC, 88040-900, Brazil*

\*Corresponding author

E-mail address: [fgmenezes10@gmail.com](mailto:fgmenezes10@gmail.com) ([F. G. Menezes](#))

## Experimental

### *General*

All reagents and solvents were acquired from reliable commercial sources and used without further purification. Stock solutions were prepared in ultrapure water (AA, NaOH and AgNO<sub>3</sub>) or in ethanol HPLC grade (RU). UV-vis analyses were performed in an Ocean Optics YSB – 650 Tide spectrophotometer, using 1cm length quartz cuvette. Transmission electronic microscopy (TEM) analyses was performed in a JEOL JEM-1011 microscopy operating in transmission mode at 100 kV. Photos for both naked eye and image analysis were taken using a Samsung Galaxy S8 smartphone. Infrared analysis were performed in Bruker FT-IR Vertex 70 instrument.

### *Synthesis of RU-AgNPs and cation sensing assays*

A solution of 500  $\mu\text{L}$  of AA 1.00 mmol L<sup>-1</sup> and 500  $\mu\text{L}$  of NaOH 1.00 mol L<sup>-1</sup> was added to solutions containing 500  $\mu\text{L}$  of RU (0.10 – 0.50 mmol L<sup>-1</sup>), 10  $\mu\text{L}$  of AgNO<sub>3</sub> 100.00 mmol L<sup>-1</sup> and 3490  $\mu\text{L}$  of ultrapure, at room temperature. For the preparation of final solutions, 500  $\mu\text{L}$  of RU-AgNPs were combined with 2500  $\mu\text{L}$  of ultrapure water. Photos and UV-Vis spectra of each solution were recorded after 30 minutes.

The cation sensing study was performed by separately adding 10  $\mu\text{L}$  of different cations (10 mmol L<sup>-1</sup>; Fe<sup>3+</sup>, Cu<sup>2+</sup>, Co<sup>2+</sup>, Zn<sup>2+</sup>, Hg<sup>2+</sup>, Ni<sup>2+</sup>, Pb<sup>2+</sup>, Mg<sup>2+</sup>, Cr<sup>3+</sup>, Sr<sup>2+</sup>, Ba<sup>2+</sup>, Cu<sup>+</sup> and Al<sup>3+</sup>) to 3990  $\mu\text{L}$  of RU-AgNPs solutions (using 0.1 mmol L<sup>-1</sup> of RU). For the preparation of final solutions, 500  $\mu\text{L}$  of RU-AgNPs were combined with 1500  $\mu\text{L}$  of ultrapure water. Photos and UV-Vis spectra were recorded after 50 minutes.

### *TEM analysis*

Images were acquired from the addition of 4  $\mu\text{L}$  of colloidal suspension to copper grid covered with formvar<sup>®</sup>. A minimum of 100 nanoparticles were measured using ImageJ<sup>®</sup> software. The average nanoparticle size and distribution were determined by a Gaussian adjustment using OriginPro<sup>®</sup> 2016 software.

### *Image data treatment*

The raw picture files from cuvettes were captured in triplicate using a smartphone. Data processing consisted of cropping, pre-processing, and image processing. Firstly, Regions of Interest (ROIs) were cropped to squares (50 x 50 pixels) using GIMP 2.8.18 software (GNU) that contained the picture region with the highest light intensity and saved it as jpeg format. Second, images were filtered using Perreault's modern constant time median filtering algorithm for speckle noise removal with R statistics version 3.6.0 platform<sup>1</sup> and EBImage package<sup>2</sup> (bioconductor.org) version 4.26. The

image processing step consisted in extracting the RGB channels of the digital images and averaging the respective values. Finally, the colorimetric absorbance for each RGB channel was calculated following the Beer-Lambert Law. Multiple Linear Regression (MLR) and Second Order Regression routines were implemented in R with 60 images of  $\text{Fe}^{3+}$  standards from 1 to 8  $\mu\text{M}$  to compare the iron (III) chromogenic probe observed and theoretical model.

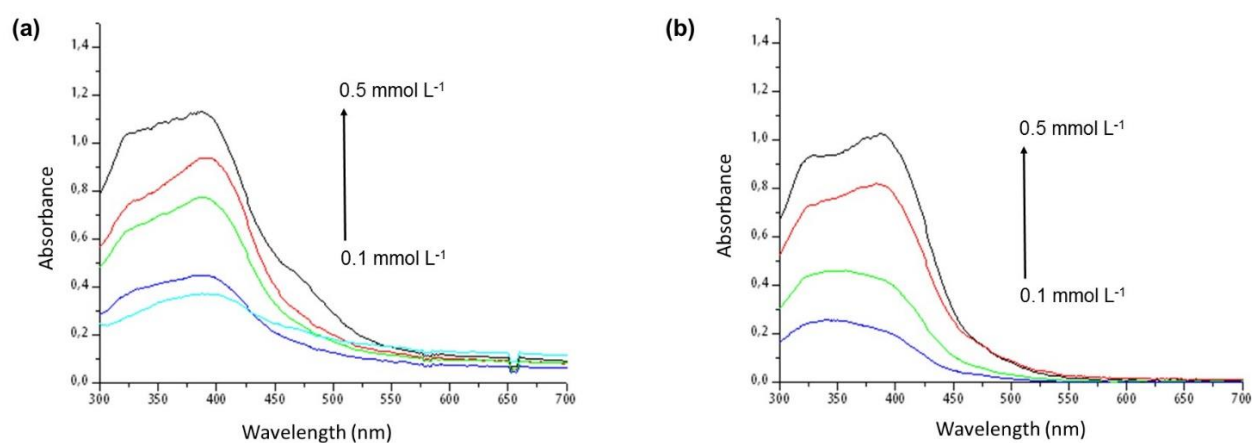

**Fig. S1.** Effect of reagent addition: UV-vis analysis of RU-AgNPs under different experimental condition: (a) addition of RU, AA, and NaOH to  $\text{AgNO}_3$  solution; (b) addition of RU and NaOH to a solution of AA and  $\text{AgNO}_3$ . In both cases, concentration of RU ranged from 1 to 5 mM while concentrations of other components were fixed at 0.2 mM  $\text{AgNO}_3$ , 0.1 mM AA and 0.1 M NaOH

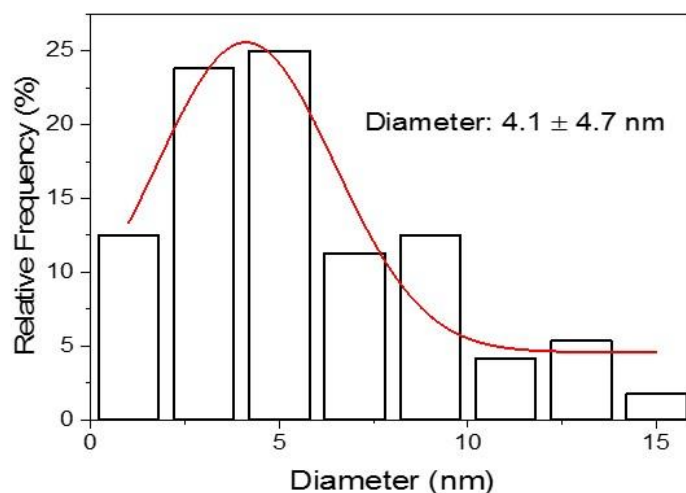

**Fig. S2.** Histogram obtained from TEM analysis for RU-AgNPs under selected condition.

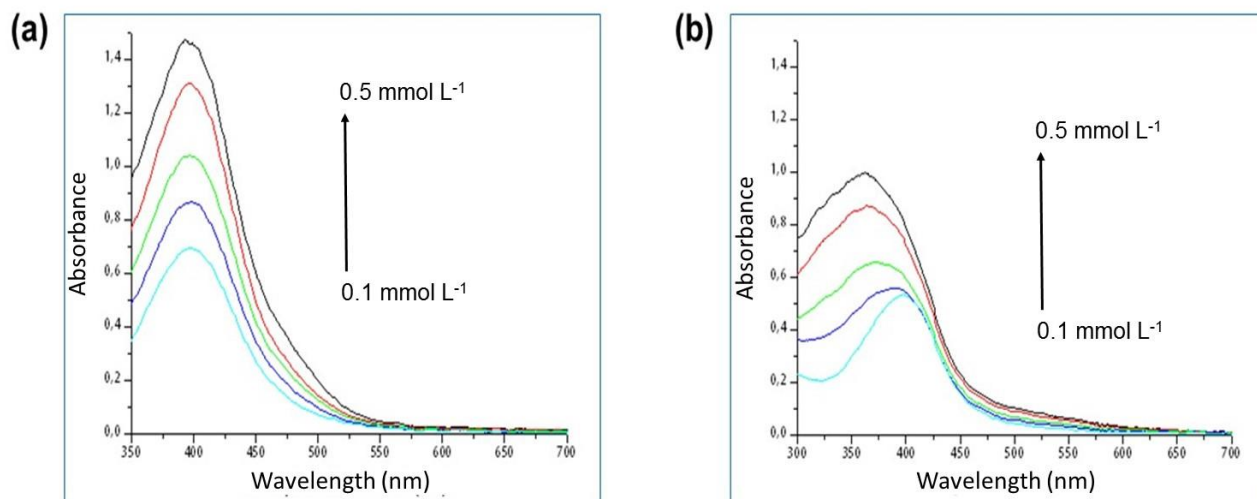

**Fig. S3.** Stability of RU-AgNPs over the time: UV-vis analysis of RU-AgNPs at initial time (a) and after 24h (b) under best experimental condition (RU, 0.1 mmol L<sup>-1</sup>; AgNO<sub>3</sub>, 0.2 mmol L<sup>-1</sup>; AA, 0.1 mmol L<sup>-1</sup>; NaOH, 0.1 mol L<sup>-1</sup>).

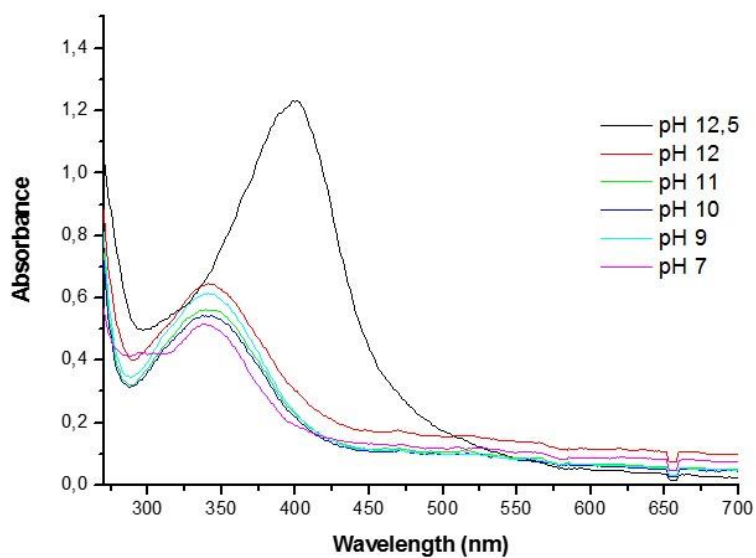

**Fig. S4.** UV-vis analysis of RU-AgNPs under best experimental condition (RU, 0.1 mmol L<sup>-1</sup>; AgNO<sub>3</sub>, 0.2 mmol L<sup>-1</sup>; AA, 0.1 mmol L<sup>-1</sup>; NaOH, 0.1 mol L<sup>-1</sup>) under different pH values.

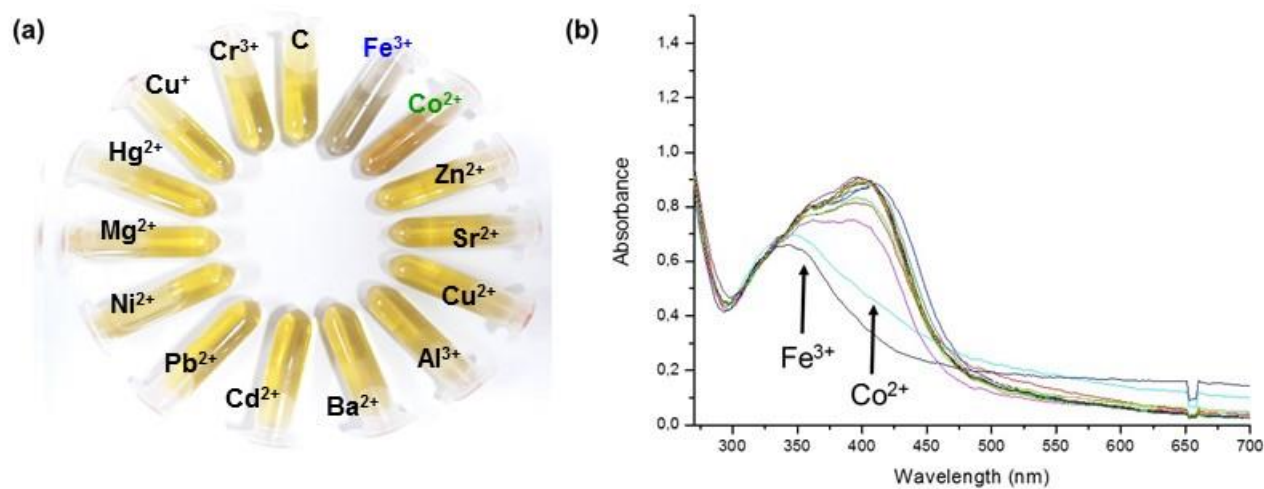

**Fig. S5.** Naked-eye (a) and UV-Vis (b) analysis of Ru-AgNPs in absence (control) and presence of  $10 \mu\text{mol L}^{-1}$  of selected metal cations ( $\text{Fe}^{3+}$ ,  $\text{Cu}^{2+}$ ,  $\text{Co}^{2+}$ ,  $\text{Zn}^{2+}$ ,  $\text{Hg}^{2+}$ ,  $\text{Ni}^{2+}$ ,  $\text{Pb}^{2+}$ ,  $\text{Mg}^{2+}$ ,  $\text{Cr}^{3+}$ ,  $\text{Sr}^{2+}$ ,  $\text{Ba}^{2+}$ ,  $\text{Cu}^+$  and  $\text{Al}^{3+}$ ) after 120 min. Experiments, RU-AgNPs were prepared in the absence of ascorbic acid.

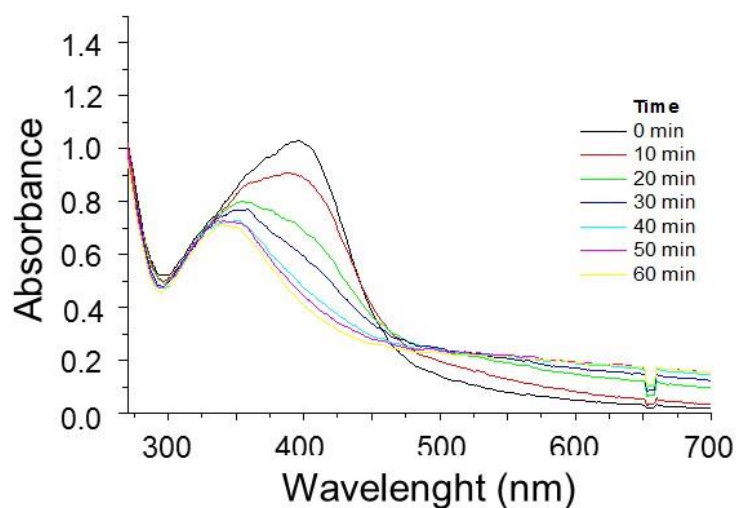

**Fig. S6.** Time-dependence in solutions of RU-AgNPs in the presence of  $\text{Fe}^{3+}$  ( $10 \mu\text{mol L}^{-1}$ ).

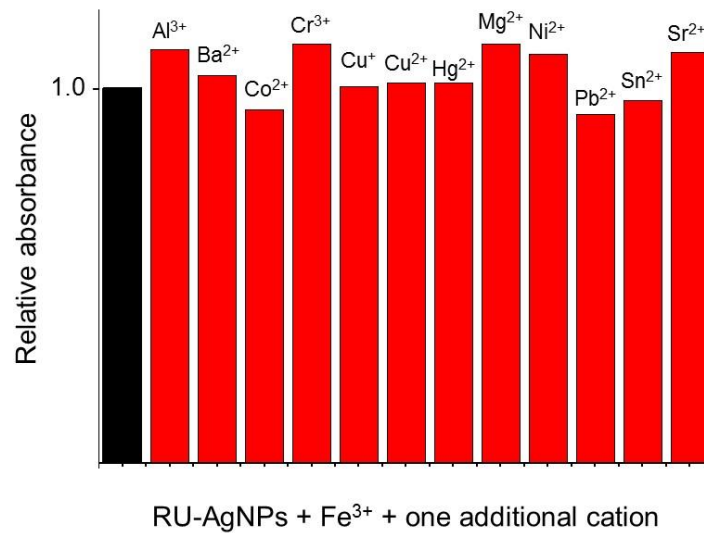

**Fig. S7.** Normalized absorbances at 404 nm for equimolar mixtures of Fe<sup>3+</sup> and one more metal ion, both 10  $\mu\text{mol.L}^{-1}$ , in the presence of RU-AgNPs. Normalization was based on absorbance of the solution containing only Fe<sup>3+</sup> and RU-AgNPs (black bar).

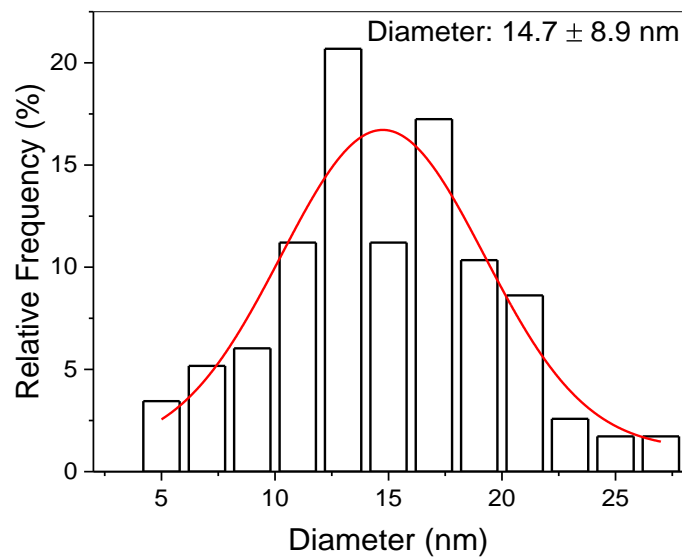

**Fig. S8.** Histogram obtained from TEM analysis for RU-AgNPs after addition of Fe<sup>3+</sup> (10  $\mu\text{mol L}^{-1}$ ).

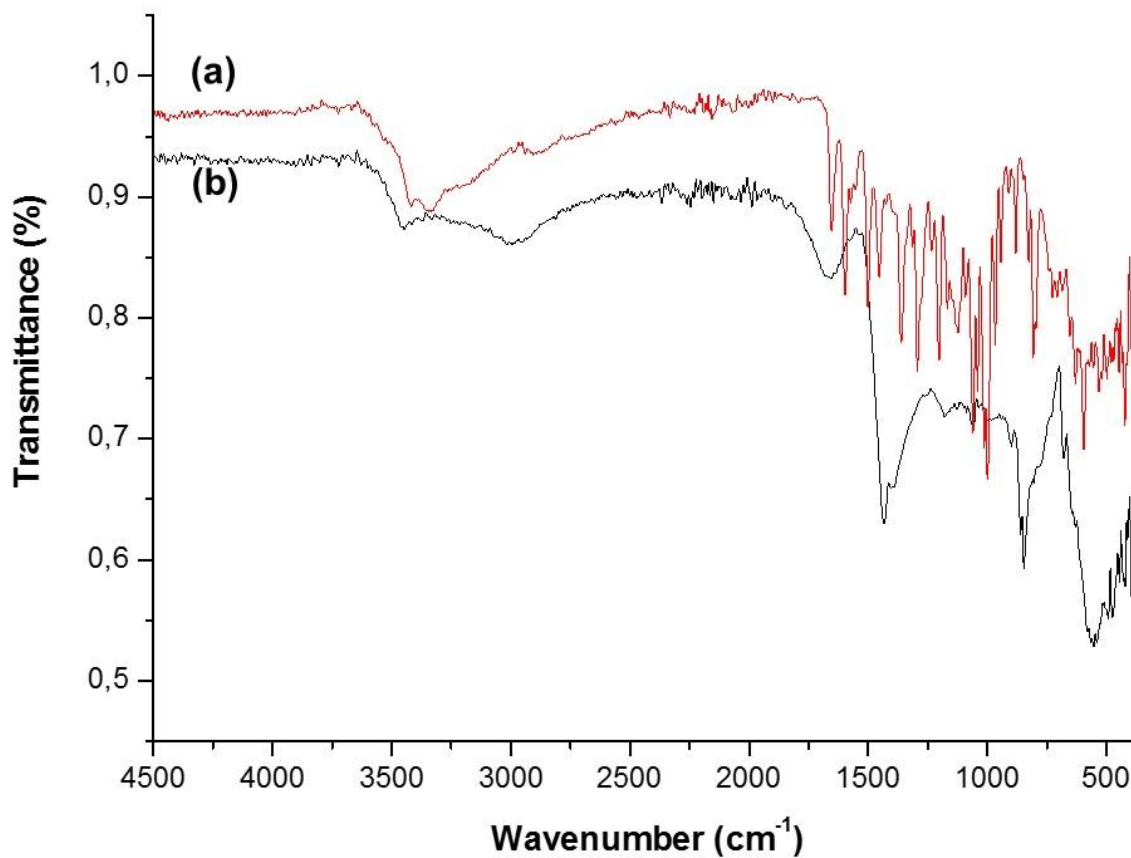

**Fig. S9.** Infrared spectra of RU (a) and RU-AgNPs (b).

## References

1. R Core Team, R: A Language and Environment for Statistical Computing, Vienna, Austria, 2019.
2. G. Pau, F. Fuchs, O. Sklyar, M. Boutros, W. Huber, *Bioinformatics*, 2010, **26**, 979.
